# Supplementary material for: Aptamer based surface plasma resonance assay for direct detection of neuron specific enolase and progastrin-releasing peptide (31-98)
Source: Royal Society of Chemistry journal article supplement (doi:10.1039/d1ra05041a), 2021-01-01
Supplement: d1ra05041a1.pdf [file d1ra05041a1.pdf]

## Supplementary Materials

### **Aptamer based surface plasma resonance assay for direct detection of neuron specific enolase and progastrin-releasing peptide (31-98)**

Linlin Sun,<sup>\*a</sup> Kemin Shen,<sup>a</sup> Jianbin Zhang,<sup>a</sup> Wenjuan Wan,<sup>a</sup> Wenjun Cao,<sup>a</sup> Zhijun  
Wang,<sup>b</sup> Chongzheng Guo<sup>a</sup>

a. Department of Public Health and Preventive Medicine, Changzhi Medical College,  
Changzhi, Shanxi, 046000, China

b. Department of Chemistry, Changzhi University, Changzhi, Shanxi, 046011, China

\* Corresponding author

E-mail: sunlinlin@czmc.edu.cn

Tel: +86-355-3151068

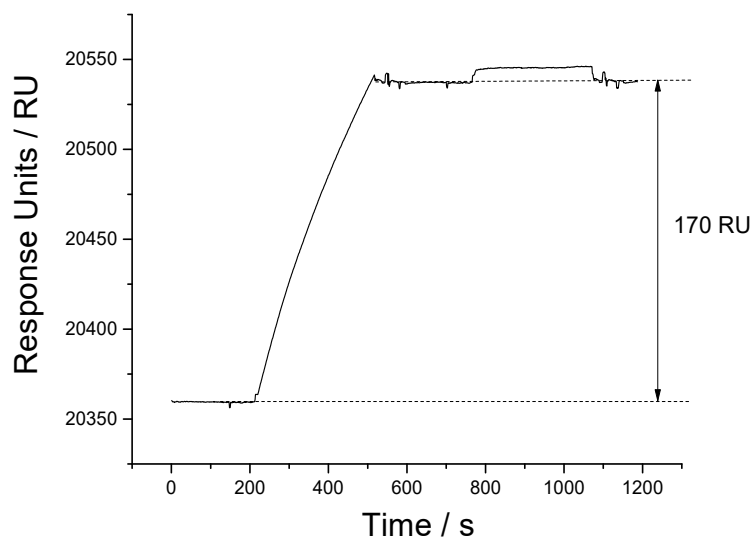

**Fig.S1** Sensorgrams for the immobilization of biotinylated aptamer against NSE (NSE-Apt5-5BioTEG) on SA sensor chip

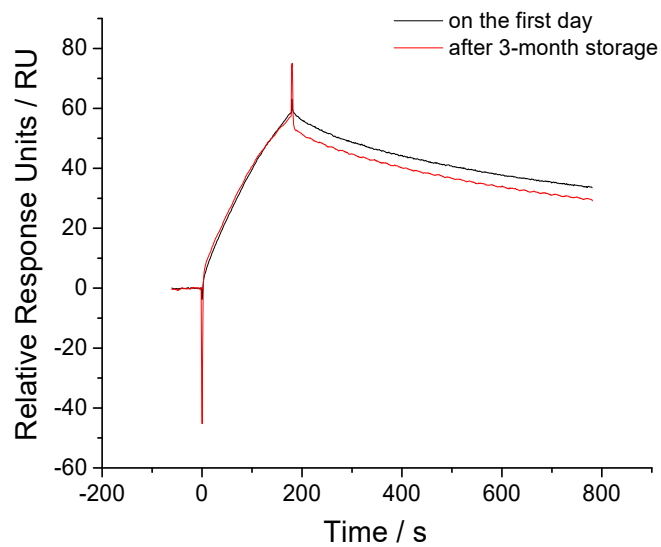

**Fig.S2** SPR responses of the prepared aptamer coated chip on the first day and after 3-month storage at 4°C to NSE (500 nM) in running buffer

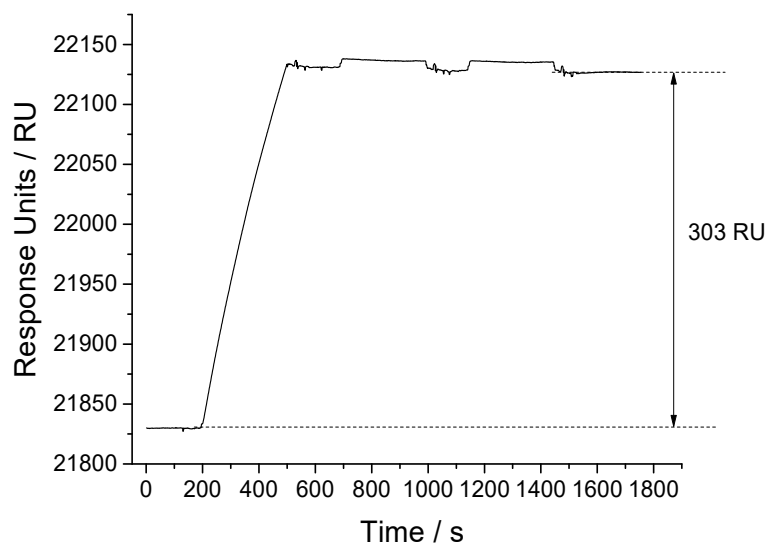

**Fig.S3** Sensorgrams for the immobilization of biotinylated aptamer against ProGRP31-98 (ProGRP-48-5BioTEG ) on SA sensor chip

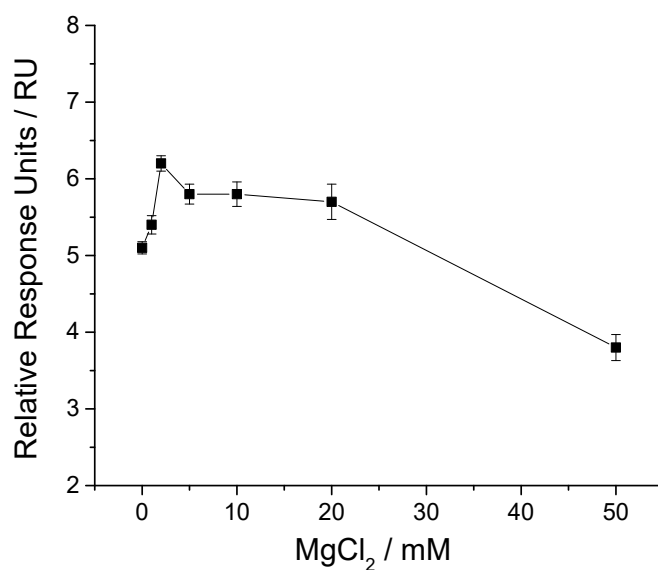

**Fig.S4** Influence of MgCl<sub>2</sub> in running buffer on ProGRP31-98 detection, expressed as the relative SPR response units induced by ProGRP31-98 (500 nM) in running buffers containing 1×PBS, pH 7.5, 0.1% Tween 20 and different concentrations of MgCl<sub>2</sub>.

The relative response units were calculated by subtracting the response units of reference cell (flow cell 1) from that of sample cell (flow cell 2).

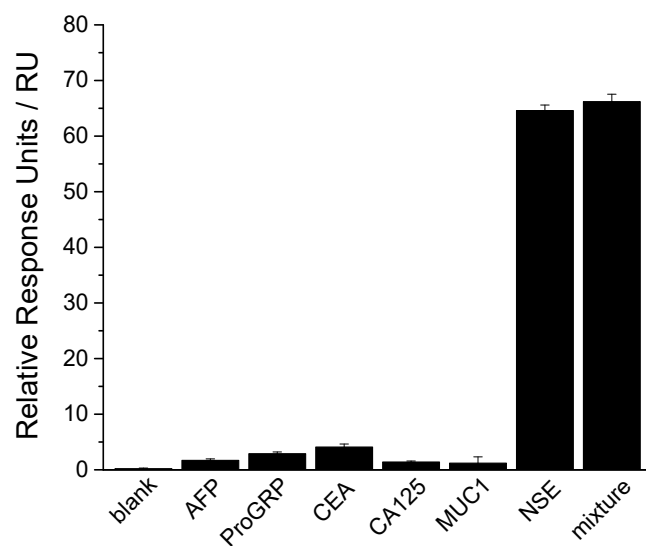

**Fig.S5** Specificity test of the anti-NSE aptamer coated chip toward some other tumor markers, including AFP, ProGRP31-98, CEA, CA125, MUC1, NSE and the mixture of these biomarkers. Each of these biomarkers was tested at 500 nM.

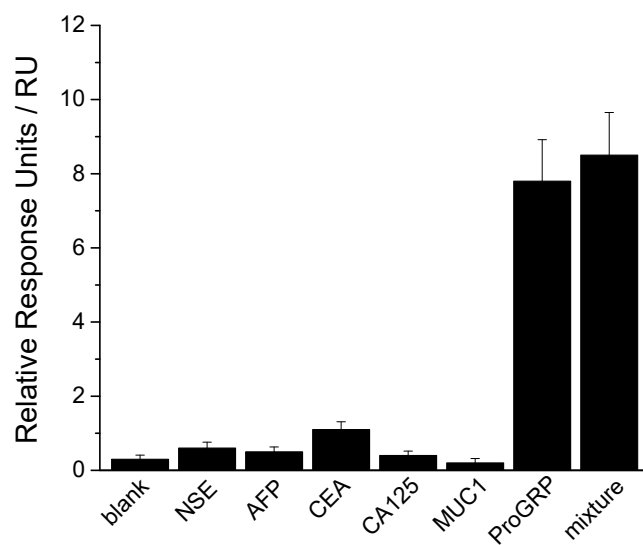

**Fig.S6** Specificity test of the anti-ProGRP31-98 aptamer coated chip toward some other tumor markers, including NSE, AFP, CEA, CA125, MUC1, ProGRP31-98 and the mixture of these biomarkers. Each of these biomarkers was tested at 500 nM.

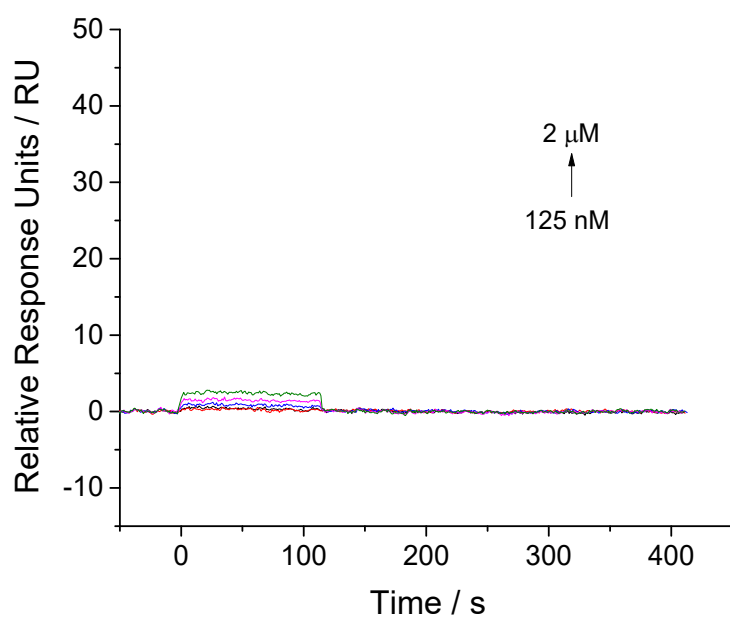

**Fig.S7** Test of sequence specificity of the aptamer by using a control DNA coated chip, which was prepared as the same procedure for aptamer immobilization. Different concentrations of NSE ranging from 125 nM to 2  $\mu$ M were injected for 120 s at a flow rate of 30  $\mu$ L/min.

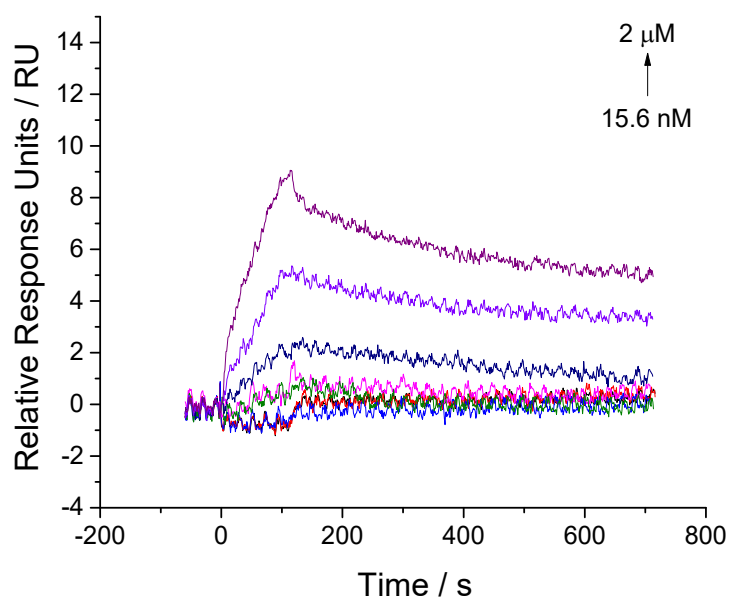

**Fig.S8** SPR sensorgrams of different concentrations of ProGRP31-98 spiked in 100-fold diluted human serum.
